# Supplementary material
Source: Springer Nature journal article supplement (https://www.springermedizin.de/resource/supplementary/13054_2011_494_MOESM3_ESM.pdf/9708608)
Supplement: MOESM3 [file 9708608]

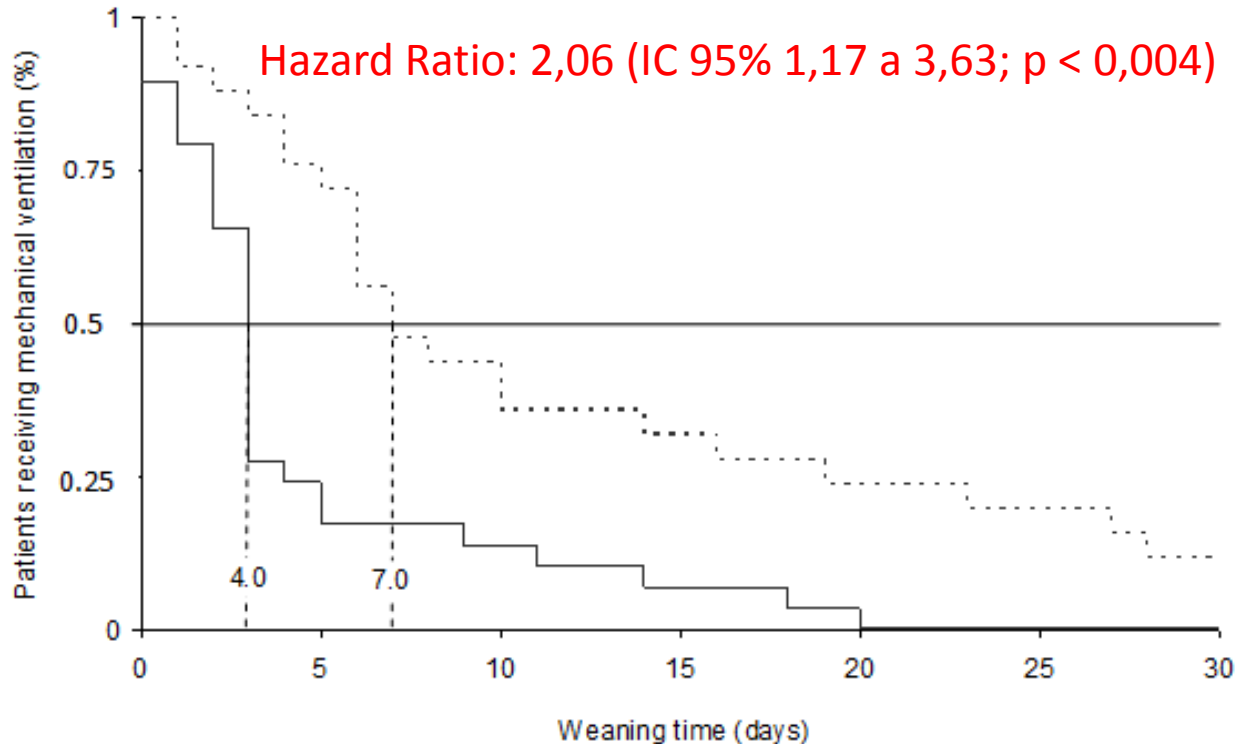

Number of patients remaining in mechanical ventilation

|           | baseline | Day 5 | Day 10 | Day 15 | Day 20 | Day 25 | Day 30 |
|-----------|----------|-------|--------|--------|--------|--------|--------|
| Methadone | 29       | 10    | 5      | 3      | 2      | 0      | 0      |
| Control   | 25       | 18    | 9      | 8      | 6      | 5      | 3      |
